# Supplementary material
Source: PubMed Central journal article supplement (PMC8690239)
Supplement: ciab998_suppl_supplementary_material.pdf [file ciab998_suppl_supplementary_material.pdf]

## Supplementary material. Table of content

- Page 2 to page 4: Supplementary Table S1. Outcome measurements according to study group and time point (day 0, 21, 28, and 49).
- Page 5: Supplementary Figure S1. Levels of SARS-CoV-2 Nucleoprotein (NP) specific IgG before mRNA vaccination.
- Page 6: Supplementary Figure S2. Multiplex immunoassay results at the different sampling times.
- Page 7: Supplementary Figure S3. Uniform Manifold Approximation and Projection (UMAP) cluster analysis of antibodies in naïve and previously infected subjects.
- Page 8 to page 15: Supplementary methods
  - Page 8: Calibration curves and accuracy. Verification of the calibration model
  - Page 9: Precision
  - Page 10: Parallelism
  - Page 11: Quantitation limit
  - Page 12: Specificity, sensitivity and cut-off determination
  - Page 15: Conclusion of the qualification
  - Page 16: Validation with commercially available assays

**Supplementary Table S1. Outcome measurements according to study group and time point (day 0, 21, 28, and 49).** Analysis of variance between different participant groups was performed using the Kruskal-Wallis test by ranks.

|                                     | naive staff<br>(N=40) | naive resident<br>(N=53) | infected staff<br>(N=66) | infected resident<br>(N=25) | Total<br>(N=184) | p<br>value |
|-------------------------------------|-----------------------|--------------------------|--------------------------|-----------------------------|------------------|------------|
| <b>Binding RBD-IgG<br/>(BAU/mL)</b> |                       |                          |                          |                             |                  |            |
| <b>Day 0</b>                        |                       |                          |                          |                             |                  |            |
| GMT                                 | 1.3                   | 1.2                      | 47.6                     | 62.8                        | 8.0              | <0.001     |
| 95% CI                              | 1.1, 1.7              | 1.0, 1.4                 | 33.8, 66.9               | 28.5, 138.1                 | 5.8, 11.0        |            |
| <b>Day 21</b>                       |                       |                          |                          |                             |                  |            |
| GMT                                 | 207.6                 | 8.8                      | 3938.7                   | 3014.2                      | 340.8            | <0.001     |
| 95% CI                              | 156.9, 274.7          | 5.6, 13.9                | 3072.3, 5049.5           | 1601.2, 5674.3              | 223.6, 519.4     |            |
| <b>Day 28</b>                       |                       |                          |                          |                             |                  |            |
| GMT                                 | 1804.7                | 72.3                     | 5633.0                   | 4614.0                      | 1220.7           | <0.001     |
| 95% CI                              | 1403.0, 2321.5        | 39.3, 132.9              | 4959.0, 6398.7           | 2770.0, 7685.3              | 874.5, 1704.0    |            |
| <b>Day 49</b>                       |                       |                          |                          |                             |                  |            |
| GMT                                 | 1357.8                | 360.1                    | 6476.3                   | 6695.4                      | 2021.1           | <0.001     |
| 95% CI                              | 1084.0, 1700.9        | 251.4, 515.9             | 5519.6, 7598.8           | 4350.2, 10304.8             | 1608.1, 2540.1   |            |
| <b>Binding S1-IgG<br/>(BAU/mL)</b>  |                       |                          |                          |                             |                  |            |
| <b>Day 0</b>                        |                       |                          |                          |                             |                  |            |
| GMT                                 | 1.5                   | 1.4                      | 51.5                     | 62.6                        | 8.8              | <0.001     |
| 95% CI                              | 1.2, 1.9              | 1.1, 1.8                 | 36.4, 72.9               | 30.8, 127.2                 | 6.4, 12.0        |            |
| <b>Day 21</b>                       |                       |                          |                          |                             |                  |            |
| GMT                                 | 228.9                 | 9.3                      | 5156.2                   | 3775.2                      | 401.0            | <0.001     |
| 95% CI                              | 177.6, 295.0          | 6.0, 14.4                | 3916.0, 6789.1           | 1879.0, 7585.0              | 259.6, 619.4     |            |
| <b>Day 28</b>                       |                       |                          |                          |                             |                  |            |
| GMT                                 | 1596.1                | 65.6                     | 7561.0                   | 5995.5                      | 1331.3           | <0.001     |
| 95% CI                              | 1265.7, 2012.7        | 35.8, 120.4              | 6389.2, 8947.5           | 3066.3, 11723.2             | 931.1, 1903.5    |            |
| <b>Day 49</b>                       |                       |                          |                          |                             |                  |            |
| GMT                                 | 1591.0                | 398.6                    | 7627.4                   | 9035.4                      | 2378.1           | <0.001     |
| 95% CI                              | 1276.1, 1983.5        | 286.9, 553.7             | 6433.8, 9042.6           | 5927.5, 13772.6             | 1888.6, 2994.4   |            |

*Table continued on the next page*

Supplementary Table S1 (continued)

|                                                       | naive staff<br>(N=40) | naive resident<br>(N=53) | infected staff<br>(N=66) | infected resident<br>(N=25) | Total<br>(N=184) | p<br>value |
|-------------------------------------------------------|-----------------------|--------------------------|--------------------------|-----------------------------|------------------|------------|
| <b>Binding S2-IgG<br/>(BAU/mL)</b>                    |                       |                          |                          |                             |                  |            |
| <b>Day 0</b>                                          |                       |                          |                          |                             |                  |            |
| GMT                                                   | 6.2                   | 4.3                      | 118.8                    | 148.2                       | 25.0             | <0.001     |
| 95% CI                                                | 4.1, 9.5              | 3.1, 5.9                 | 88.8, 158.9              | 89.9, 244.5                 | 18.6, 33.5       |            |
| <b>Day 21</b>                                         |                       |                          |                          |                             |                  |            |
| GMT                                                   | 70.5                  | 10.2                     | 1962.7                   | 1250.6                      | 194.2            | <0.001     |
| 95% CI                                                | 52.3, 94.9            | 6.9, 15.0                | 1485.2, 2593.6           | 776.2, 2014.9               | 133.8, 281.9     |            |
| <b>Day 28</b>                                         |                       |                          |                          |                             |                  |            |
| GMT                                                   | 190.0                 | 22.8                     | 1968.3                   | 1373.0                      | 312.3            | <0.001     |
| 95% CI                                                | 140.5, 256.9          | 15.0, 34.8               | 1562.9, 2478.9           | 844.1, 2233.1               | 226.3, 431.0     |            |
| <b>Day 49</b>                                         |                       |                          |                          |                             |                  |            |
| GMT                                                   | 112.5                 | 48.4                     | 1259.6                   | 1154.8                      | 288.6            | <0.001     |
| 95% CI                                                | 90.9, 139.2           | 35.7, 65.5               | 1026.5, 1545.7           | 774.5, 1722.0               | 224.4, 371.0     |            |
| <b>RBD-IgG avidity <math>K_{off}</math><br/>(1/s)</b> |                       |                          |                          |                             |                  |            |
| <b>Day 0</b>                                          |                       |                          |                          |                             |                  |            |
| Not measured                                          | 40                    | 53                       | 23                       | 7                           | 123              |            |
| GMT                                                   | NA                    | NA                       | 1.6e-3                   | 1.6e-3                      | 1.6e-3           |            |
| 95% CI                                                | /                     | /                        | 1.2e-3, 2.2e-3           | 9.7e-4, 2.5e-3              | 1.2e-3, 2.1e-3   |            |
| <b>Day 21</b>                                         |                       |                          |                          |                             |                  |            |
| Not measured                                          | 4                     | 43                       | 6                        | 1                           | 54               | <0.001     |
| GMT                                                   | 6.2e-4                | 1.5e-5                   | 4.0e-5                   | 4.2e-5                      | 1.1e-4           |            |
| 95% CI                                                | 5.3e-4, 7.4e-4        | 7.4e-5, 2.9e-3           | 3.1e-5, 5.4e-5           | 2.2e-5, 8.0e-5              | 8.5e-5, 1.6e-4   |            |
| <b>Day 28</b>                                         |                       |                          |                          |                             |                  |            |
| Not measured                                          | .                     | 22                       | 4                        | 2                           | 28               | <0.001     |
| GMT                                                   | 1.3e-4                | 7.0e-4                   | 2.5e-5                   | 3.5e-5                      | 7.8e-5           |            |
| 95% CI                                                | 1.1e-4, 1.5e-4        | 4.7e-4, 1.0e-3           | 1.9e-5, 3.3e-5           | 1.6e-5, 7.3e-5              | 5.9e-5, 1.0e-4   |            |
| <b>Day 49</b>                                         |                       |                          |                          |                             |                  |            |
| Not measured                                          | .                     | 21                       | 3                        | 2                           | 26               | <0.001     |
| GMT                                                   | 1.5e-4                | 3.2e-4                   | 2.2e-5                   | 1.2e-5                      | 5.6e-5           |            |
| 95% CI                                                | 1.2e-4, 1.8e-4        | 2.5e-4, 4.0e-4           | 1.4e-5, 3.4e-5           | 5.0e-6, 2.9e-5              | 4.1e-5, 7.5e-5   |            |

Table continued on the next page

Supplementary Table S1 (continued)

|                                       | naive staff<br>(N=40) | naive resident<br>(N=53) | infected staff<br>(N=66) | infected resident<br>(N=25) | Total<br>(N=184) | p<br>value |
|---------------------------------------|-----------------------|--------------------------|--------------------------|-----------------------------|------------------|------------|
| <b>50% neutralization (wild type)</b> |                       |                          |                          |                             |                  |            |
| <b>Day 0</b>                          |                       |                          |                          |                             |                  |            |
| GMT                                   | 25.0                  | 25.0                     | 57.1                     | 67.6                        | 38.5             | <0.001     |
| 95% CI                                | 25.0, 25.0            | 25.0, 25.0               | 46.4, 70.3               | 46.3, 98.6                  | 34.5, 42.9       |            |
| <b>Day 21</b>                         |                       |                          |                          |                             |                  |            |
| GMT                                   | 27.7                  | 25.0                     | 2200.4                   | 2409.0                      | 239.9            | <0.001     |
| 95% CI                                | 25.4, 30.2            | 25.0, 25.0               | 1521.6, 3182.2           | 1410.4, 4114.6              | 167.4, 343.8     |            |
| <b>Day 28</b>                         |                       |                          |                          |                             |                  |            |
| GMT                                   | 252.6                 | 34.3                     | 3677.3                   | 3330.7                      | 527.2            | <0.001     |
| 95% CI                                | 193.8, 329.2          | 29.0, 40.5               | 2944.8, 4592.0           | 1950.4, 5687.9              | 382.6, 726.5     |            |
| <b>Day 49</b>                         |                       |                          |                          |                             |                  |            |
| GMT                                   | 154.8                 | 48.4                     | 2943.0                   | 2900.6                      | 475.4            | <0.001     |
| 95% CI                                | 117.0, 204.9          | 38.7, 60.4               | 2261.3, 3830.1           | 1817.2, 4629.7              | 350.6, 644.7     |            |
| <b>50% neutralization (B.1.351)</b>   |                       |                          |                          |                             |                  |            |
| <b>Day 0</b>                          |                       |                          |                          |                             |                  |            |
| Not measured                          | 39                    | 53                       | 21                       | 6                           | 119              |            |
| GMT                                   | 25.0                  | NA                       | 26.5                     | 30.8                        | 27.7             |            |
| 95% CI                                | /                     | /                        | 24.8, 28.4               | 23.4, 40.6                  | 25.3, 30.4       |            |
| <b>Day 21</b>                         |                       |                          |                          |                             |                  |            |
| Not measured                          | 29                    | 53                       | 5                        | 1                           | 88               |            |
| GMT                                   | 25.0                  | NA                       | 531.2                    | 400.8                       | 348.8            |            |
| 95% CI                                | 25.0, 25.0            | /                        | 393.7, 716.8             | 235.5, 682.0                | 258.6, 470.4     |            |
| <b>Day 28</b>                         |                       |                          |                          |                             |                  |            |
| Not measured                          | .                     | 36                       | .                        | 1                           | 37               | <0.001     |
| GMT                                   | 37.1                  | 26.0                     | 612.1                    | 523.6                       | 193.1            |            |
| 95% CI                                | 32.0, 43.0            | 23.9, 28.3               | 465.7, 804.6             | 307.2, 892.3                | 146.7, 254.2     |            |
| <b>Day 49</b>                         |                       |                          |                          |                             |                  |            |
| Not measured                          | .                     | 21                       | .                        | 1                           | 22               | <0.001     |
| GMT                                   | 27.5                  | 25.0                     | 438.3                    | 478.5                       | 127.3            |            |
| 95% CI                                | 25.1, 30.2            | 25.0, 25.0               | 332.3, 578.2             | 252.2, 908.1                | 97.9, 165.6      |            |

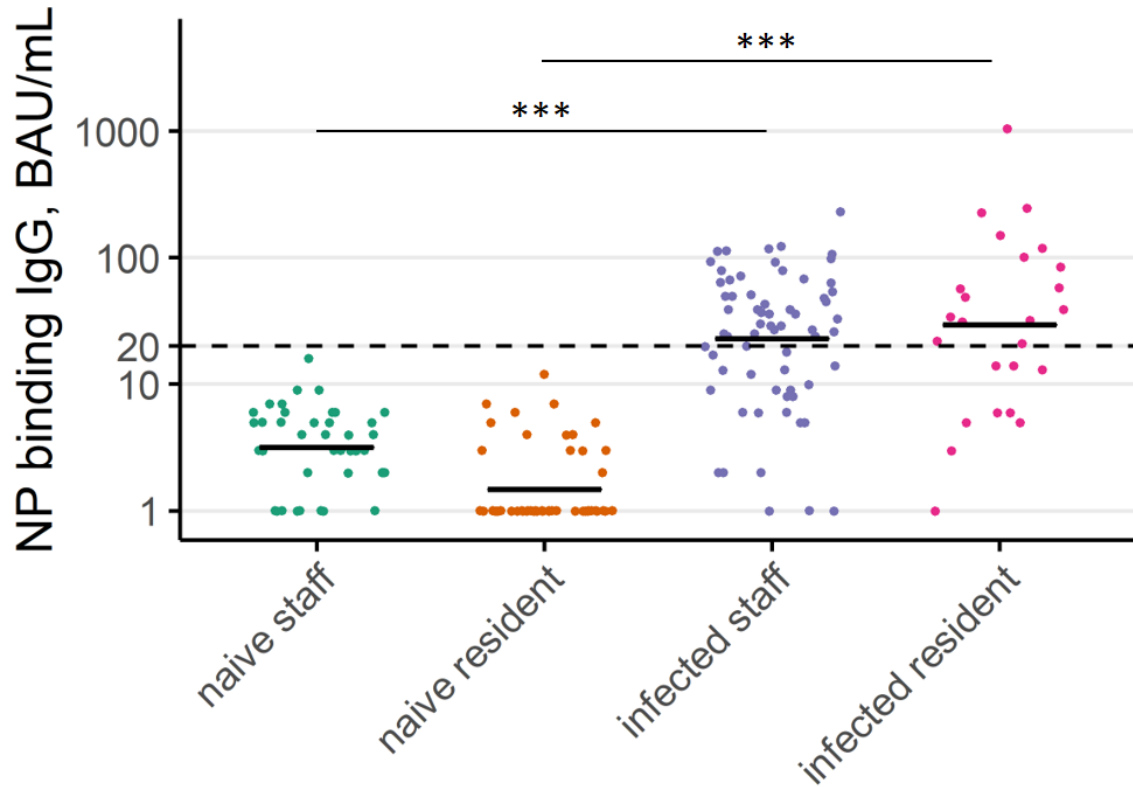

**Supplementary Figure S1. Levels of SARS-CoV-2 Nucleoprotein (NP) specific IgG before mRNA vaccination.** Serum levels of NP-specific IgG were measured on day 0, before Black bars indicate geometric mean titers (GMT). Cut-off concentration is 20 BAU/ml. Statistical comparisons were made between the different study groups using the Kruskal-Wallis test by ranks, and the Mann-Whitney U post-hoc test. Statistical significance is denoted as: \*  $p < 0.05$ ; \*\*  $p < 0.01$ ; and \*\*\*  $p < 0.001$ . 62% (40/65) and 63% (15/24) of infected staff and residents, respectively, had NP-specific IgG titers above the cut-off whereas all naive participants had NP-specific IgG titers below the cut-off.

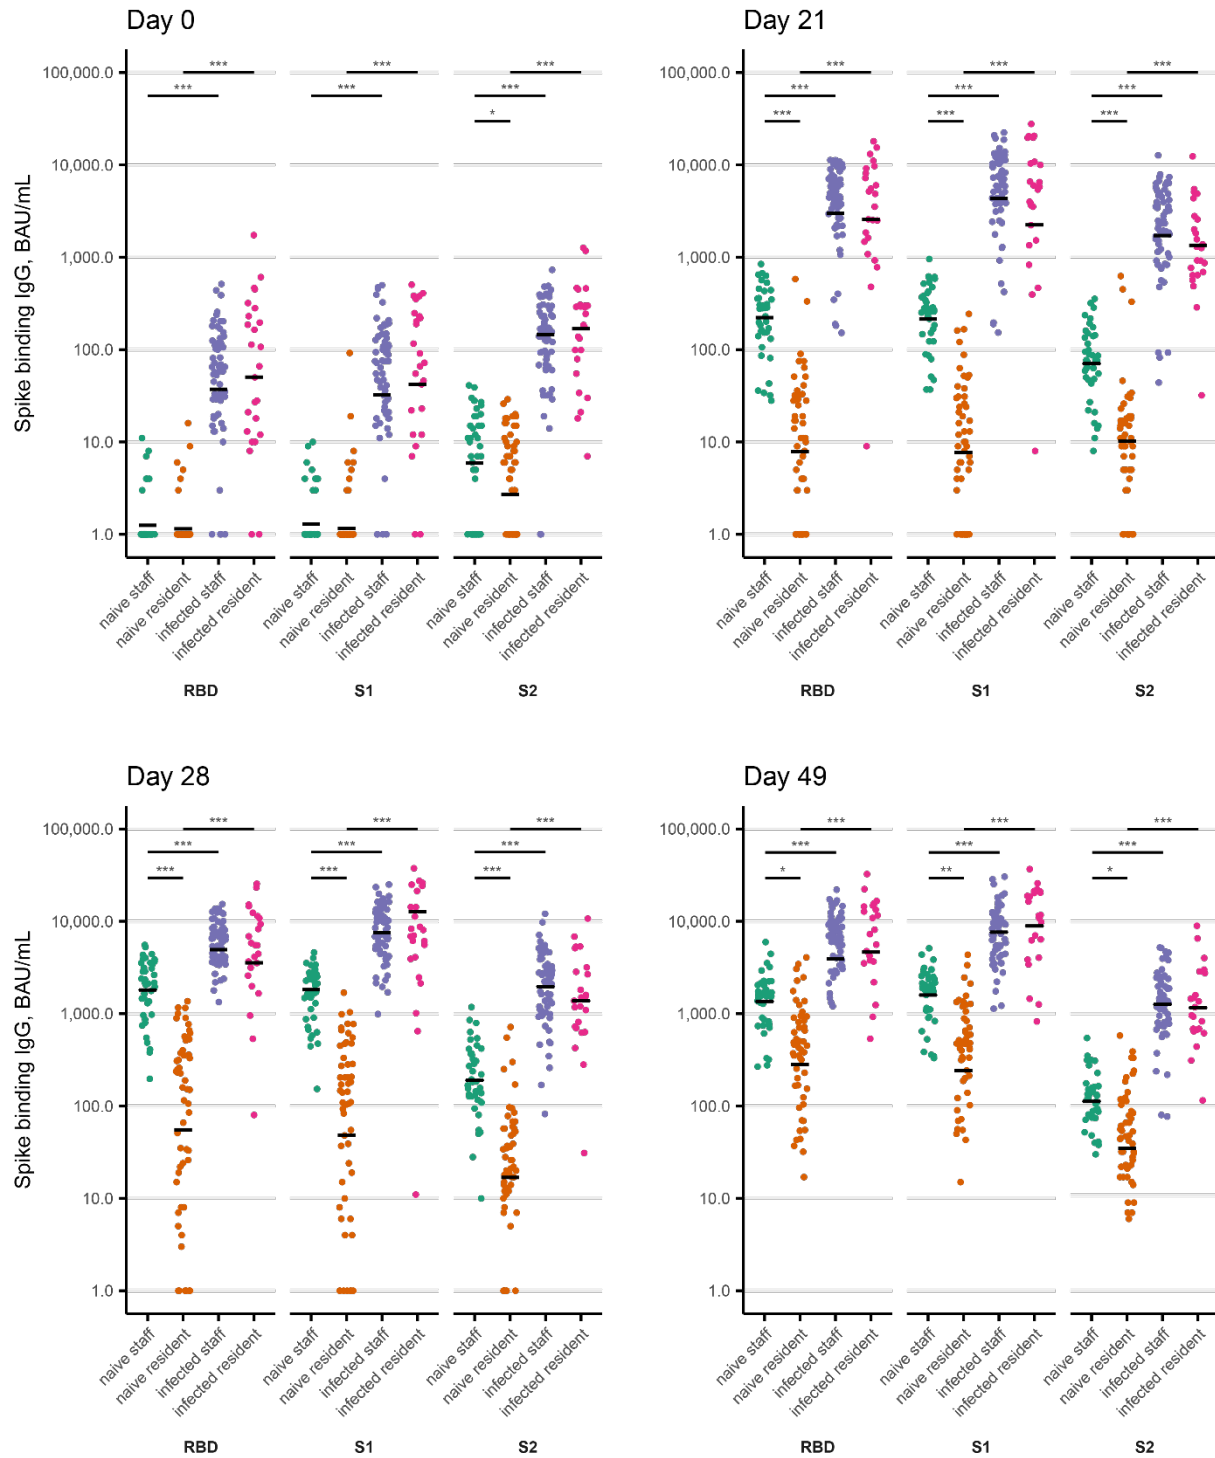

**Supplementary Figure S2. Multiplex immunoassay results at the different sampling times.** Serum levels of spike (RBD, S1, and S2) binding IgG are presented for each sampling day. Black bars indicate geometric mean titers. Cut-off concentrations are 15 BAU/ml, 20 BAU/ml and 20 BAU/ml for anti-RBD IgG, anti-S1 IgG and anti-S2 IgG, respectively. Statistical comparisons were made between the different participant groups using the Kruskal-Wallis test by ranks, and the Mann-Whitney U post-hoc test. Statistical significance is denoted as: \*  $p < 0.05$ ; \*\*  $p < 0.01$ ; and \*\*\*  $p < 0.001$ .

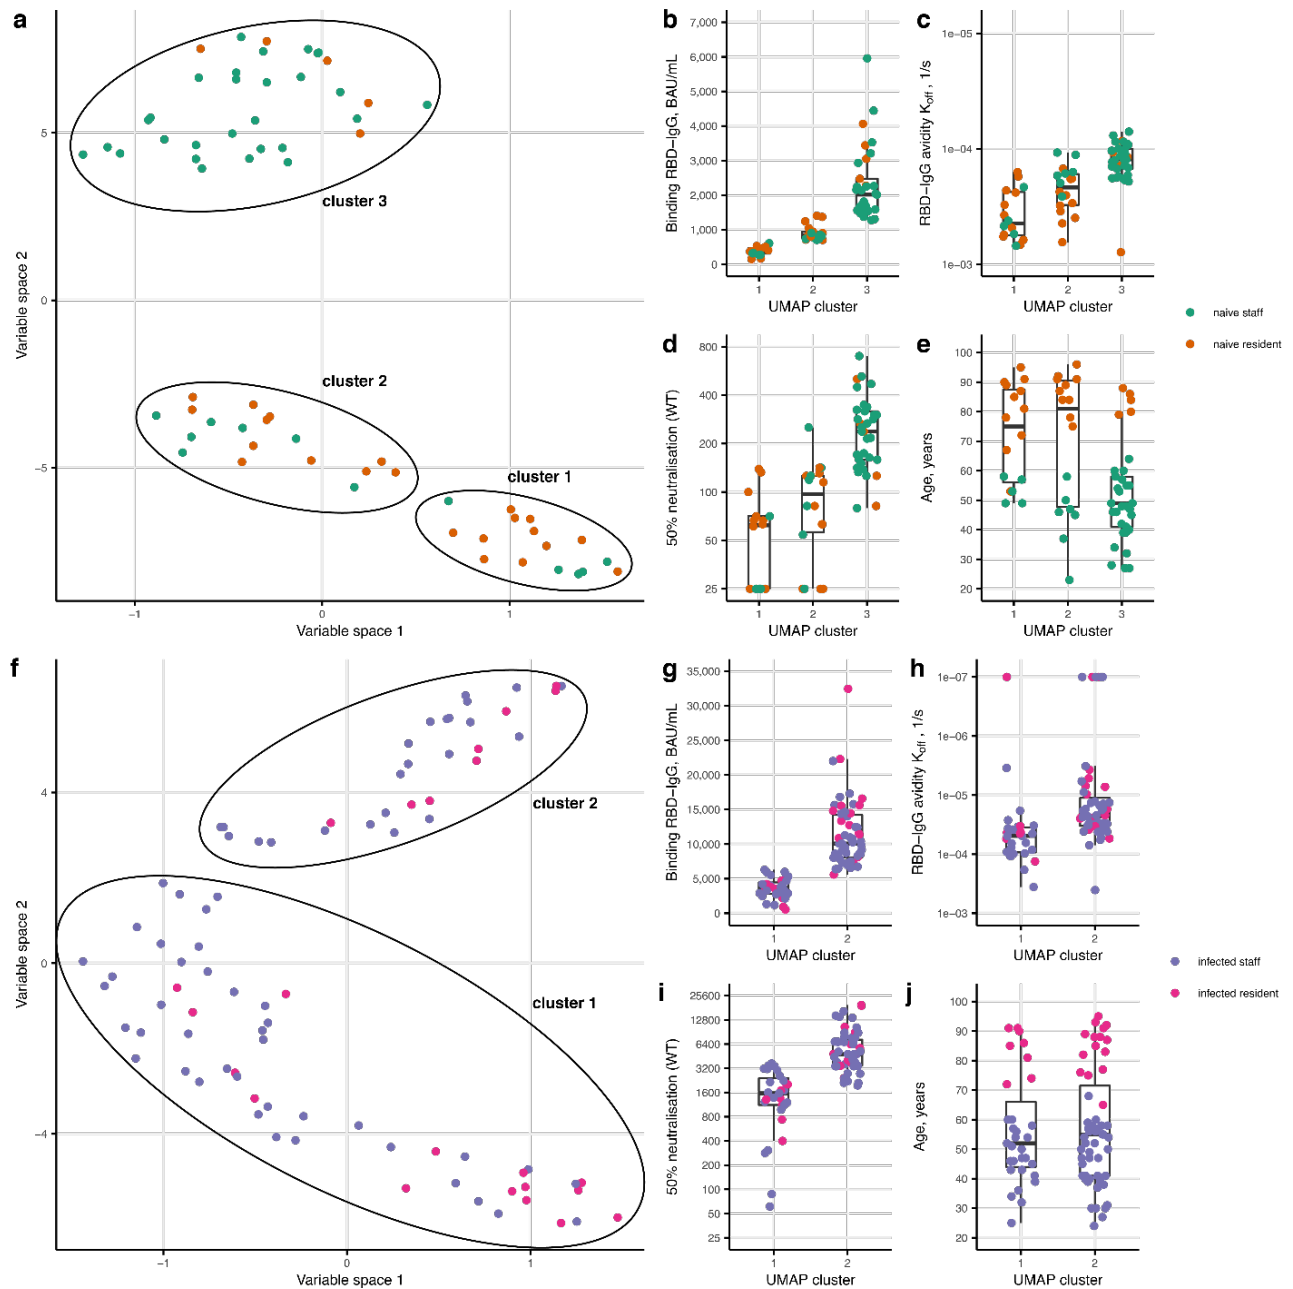

**Supplementary Figure S3. Uniform Manifold Approximation and Projection (UMAP) cluster analysis of antibodies in naïve and previously infected subjects.** Dimensionality reduction of the following outcomes at day 49: anti-RBD/S1/S2 IgG, anti-RBD IgG avidity, and WT NT50. Stratification occurred for naïve (a-e) and previously infected (f-j) participants. Avidity was log<sub>10</sub> and neutralization log<sub>2</sub> transformed. The optimal number of clusters was tested via the k-means (range 1:10) and visually identified with an “elbow” in a plot of variance versus number of clusters. DBSCAN identified clusters within the UMAP reduced dimensions.

## SUPPLEMENTARY METHODS

### A. Assay qualification

#### 1. Calibration curves and accuracy. Verification of the calibration model

**Methods:** Calibration curves were obtained by serially diluting (duplicates, S1-S10) the WHO International standard NIBSC 20/136 ([https://www.nibsc.org/science\\_and\\_research/idd/cfar/covid-19\\_reagents.aspx](https://www.nibsc.org/science_and_research/idd/cfar/covid-19_reagents.aspx)) and measuring net Mean Pixel Intensities (MPI). MPI were plotted against the corresponding units (expressed as Binding Antibody Units (BAU)/ml) and a four-parameter logistic (4PL) standard curve was used for interpolation (GraphPad Prism version 9.0.0 for Windows) (**Fig.S4**). Accuracy was determined by back-calculating the concentrations of the calibration standards using the 4PL-curves, within a single run (within-run accuracy, expressed as recovery (%)), or within 5 runs (between-run accuracy, expressed as mean recovery (%)) (**Tab.S2 and Tab.S3**).

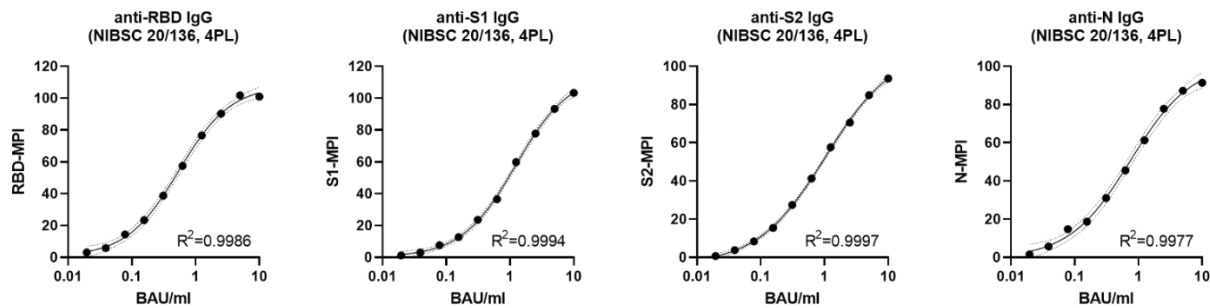

**Supplementary Figure S4.** Representative sigmoidal 4PL calibration curves used for interpolation.

| Sample ID | Nominal conc<br>BAU/ml | Back-calculated results |               |                |               |                |               |                |               |
|-----------|------------------------|-------------------------|---------------|----------------|---------------|----------------|---------------|----------------|---------------|
|           |                        | anti-RBD IgG            |               | anti-S1 IgG    |               | anti-S2 IgG    |               | anti-N IgG     |               |
|           |                        | conc<br>BAU/ml          | recovery<br>% | conc<br>BAU/ml | recovery<br>% | conc<br>BAU/ml | recovery<br>% | conc<br>BAU/ml | recovery<br>% |
| S1        | 10.000                 | 8.464                   | 85            | 9.769          | 98            | 9.815          | 98            | 9.483          | 95            |
| S2        | 5.000                  | 5.525                   | 110           | 4.959          | 99            | 5.103          | 102           | 5.511          | 110           |
| S3        | 2.500                  | 2.425                   | 97            | 2.550          | 102           | 2.493          | 100           | 2.606          | 104           |
| S4        | 1.250                  | 1.285                   | 103           | 1.276          | 102           | 1.241          | 99            | 1.186          | 95            |
| S5        | 0.625                  | 0.621                   | 99            | 0.611          | 98            | 0.627          | 100           | 0.625          | 100           |
| S6        | 0.313                  | 0.302                   | 97            | 0.311          | 100           | 0.315          | 101           | 0.314          | 101           |
| S7        | 0.156                  | 0.156                   | 100           | 0.173          | 111           | 0.152          | 97            | 0.159          | 102           |
| S8        | 0.078                  | 0.083                   | 106           | 0.088          | 112           | 0.084          | 108           | 0.083          | 107           |
| S9        | 0.039                  | 0.035                   | 88            | 0.035          | 89            | 0.036          | 91            | 0.038          | 98            |
| S10       | 0.020                  | 0.019                   | 99            | 0.018          | 90            | 0.020          | 100           | 0.017          | 89            |

**Supplementary Table S2.** Within-run accuracy.



| Sample ID | Nominal conc<br>BAU/ml | Back-calculated results |                 |                     |                 |                     |                 |                     |                 |
|-----------|------------------------|-------------------------|-----------------|---------------------|-----------------|---------------------|-----------------|---------------------|-----------------|
|           |                        | anti-RBD IgG            |                 | anti-S1 IgG         |                 | anti-S2 IgG         |                 | anti-N IgG          |                 |
|           |                        | Mean conc<br>BAU/ml     | Mean recovery % | Mean conc<br>BAU/ml | Mean recovery % | Mean conc<br>BAU/ml | Mean recovery % | Mean conc<br>BAU/ml | Mean recovery % |
| S1        | 10.000                 | 7.929                   | 79              | 9.434               | 94              | 10.200              | 102             | 9.826               | 98              |
| S2        | 5.000                  | 5.296                   | 106             | 5.226               | 105             | 5.064               | 101             | 5.013               | 100             |
| S3        | 2.500                  | 2.627                   | 105             | 2.486               | 99              | 2.403               | 96              | 2.604               | 104             |
| S4        | 1.250                  | 1.272                   | 102             | 1.240               | 99              | 1.319               | 106             | 1.225               | 98              |
| S5        | 0.625                  | 0.615                   | 98              | 0.621               | 99              | 0.620               | 99              | 0.643               | 103             |
| S6        | 0.313                  | 0.302                   | 97              | 0.315               | 101             | 0.318               | 102             | 0.330               | 106             |
| S7        | 0.156                  | 0.162                   | 103             | 0.161               | 103             | 0.141               | 90              | 0.149               | 95              |
| S8        | 0.078                  | 0.083                   | 106             | 0.082               | 105             | 0.084               | 108             | 0.075               | 96              |
| S9        | 0.039                  | 0.035                   | 90              | 0.034               | 87              | 0.035               | 89              | 0.038               | 98              |
| S10       | 0.020                  | 0.018                   | 93              | 0.021               | 105             | 0.020               | 104             | 0.020               | 101             |

**Supplementary Table S3.** Between-run accuracy (mean of 5 runs).

**Conclusion:** The MIA-assay is accurate for measuring IgG antibodies directed to RBD, S1, S2 and N. After back-calculation, the % recovery between measured concentrations and their nominal concentrations was within 85-115%, except for anti-RBD IgG at the highest concentration (mean recovery 79%) where a Hook-effect was observed.

## 2. Precision

**Methods:** The precision of the MIA-assay was evaluated by repeated measurements of anti-RBD IgG, anti-S1 IgG, anti-S2 IgG and anti-N IgG concentrations (BAU/ml) of 1 negative and 4 positive samples (2 for anti-N IgG). For within-run precision (repeatability), 15 replicates of the same sample were measured within a single run (**Tab. S4**). For between-run precision (intermediate precision), samples were measured in 4 different runs on different days (**Tab. S5**).

|              |                |      |      |      |      |       |
|--------------|----------------|------|------|------|------|-------|
| anti-RBD IgG | Sample         | NEG  | POS1 | POS2 | POS3 | POS4  |
|              | MEAN (BAU/ml)  | 0.35 | 38   | 726  | 3361 | 24471 |
|              | STDEV (BAU/ml) | 0.04 | 2    | 54   | 305  | 1610  |
|              | % CV           |      | 6.4  | 7.4  | 9.1  | 6.6   |
| anti-S1 IgG  | Sample         | NEG  | POS1 | POS2 | POS3 | POS4  |
|              | MEAN (BAU/ml)  | 0.71 | 68   | 481  | 4700 | 18403 |
|              | STDEV (BAU/ml) | 0.22 | 4    | 46   | 458  | 925   |
|              | % CV           |      | 6.2  | 9.5  | 9.7  | 5.0   |
| anti-S2 IgG  | Sample         | NEG  | POS1 | POS2 | POS3 | POS4  |
|              | MEAN (BAU/ml)  | 1.42 | 76   | 456  | 4196 | 9622  |
|              | STDEV (BAU/ml) | 0.17 | 9    | 39   | 306  | 952   |
|              | % CV           |      | 11.4 | 8.5  | 7.3  | 9.9   |
| anti-N IgG   | Sample         | NEG  | POS1 | POS2 |      |       |
|              | MEAN (BAU/ml)  | 0.58 | 49   | 346  |      |       |
|              | STDEV (BAU/ml) | 0.21 | 8.67 | 51   |      |       |
|              | % CV           |      | 17.7 | 14.7 |      |       |

**Supplementary Table S4.** Within-run precision.

|              |                |      |      |      |      |       |
|--------------|----------------|------|------|------|------|-------|
| anti-RBD IgG | Sample         | NEG  | POS1 | POS2 | POS3 | POS4  |
|              | run 1          | 0.36 | 42   | 713  | 3421 | 24471 |
|              | run 2          | 0.47 | 36   | 758  | 3621 | 26279 |
|              | run 3          | 0.22 | 44   | 720  | 3441 | 21480 |
|              | run 4          | 0.35 | 38   | 726  | 3361 | 24471 |
|              | MEAN (BAU/ml)  | 0.35 | 40   | 729  | 3461 | 24175 |
|              | STDEV (BAU/ml) | 0.10 | 4    | 20   | 112  | 1989  |
|              | % CV           |      | 9.6  | 2.7  | 3.2  | 8.2   |
| anti-S1 IgG  | Sample         | NEG  | POS1 | POS2 | POS3 | POS4  |
|              | run 1          | 0.78 | 57   | 492  | 4032 | 19156 |
|              | run 2          | 0.67 | 58   | 520  | 4777 | 20251 |
|              | run 3          | 0.69 | 72   | 571  | 4230 | 20198 |
|              | run 4          | 0.71 | 68   | 481  | 4700 | 18403 |
|              | MEAN (BAU/ml)  | 0.71 | 64   | 516  | 4435 | 19502 |
|              | STDEV (BAU/ml) | 0.05 | 7    | 40   | 361  | 889   |
|              | % CV           |      | 11.6 | 7.8  | 8.1  | 4.6   |
| anti-S2 IgG  | Sample         | NEG  | POS1 | POS2 | POS3 | POS4  |
|              | run 1          | 0.68 | 93   | 490  | 4267 | 9423  |
|              | run 2          | 0.74 | 85   | 479  | 3723 | 7778  |
|              | run 3          | 0.71 | 79   | 426  | 4706 | 10704 |
|              | run 4          | 1.42 | 76   | 456  | 4196 | 9622  |
|              | MEAN (BAU/ml)  | 0.89 | 83   | 463  | 4223 | 9382  |
|              | STDEV (BAU/ml) | 0.36 | 8    | 28   | 402  | 1208  |
|              | % CV           |      | 9.0  | 6.1  | 9.5  | 12.9  |
| anti-N IgG   | Sample         | NEG  | POS1 | POS2 |      |       |
|              | run 1          | 0.91 | 29   | 452  |      |       |
|              | run 2          | 1.28 | 36   | 431  |      |       |
|              | run 3          | 1.79 | 32   | 327  |      |       |
|              | run 4          | 0.58 | 49   | 346  |      |       |
|              | MEAN (BAU/ml)  | 1.14 | 37   | 389  |      |       |
|              | STDEV (BAU/ml) | 0.52 | 9    | 62   |      |       |
|              | % CV           |      | 24.1 | 15.9 |      |       |

**Supplementary Table S5.** Between-run precision.

**Conclusion:** The MIA-assay is precise for measuring IgG antibodies directed to RBD, S1 and S2, with % CV for repeated measurements <12%. For repeated anti-N IgG measurement, % CV are slightly higher, but are considered acceptable.

### 3. Parallelism

**Methods:** Parallelism of the MIA-assay was evaluated by plotting 4PL curves (measured response (MPI) against log serum dilution) obtained with serial dilutions of the calibrating standard NIBSC 20/136 (4 standard curves, black) and with serial dilutions of positive test samples (4 curves, blue) (**Fig. S5**).

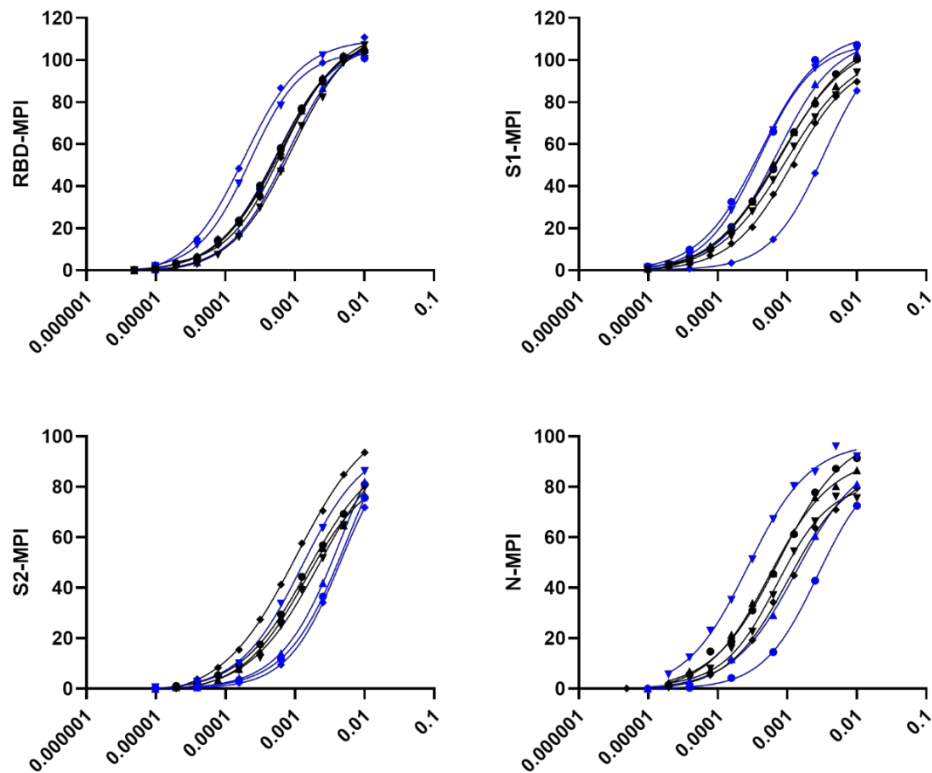

**Supplementary Figure S5.** Parallelism of the MIA-assay.

**Conclusion:** Concentration-response plots of the 4 test samples and calibration standards showed a good parallelism for anti-RBD IgG, anti-S1 IgG, anti-S2 IgG and anti-N IgG.

### 4. Quantitation limit

**Methods:** The lower limit of quantification (LLOQ) was defined as the lowest concentration of the standard curve with % recovery between measured concentration and nominal concentration within 85-115%. Accuracy-data demonstrate that back-calculated results are acceptable till calibrator concentration 0.02 BAU/ml.

Conclusions: As the lowest test dilution used is 1/100, LLOQ was set at 2 BAU/ml for anti-RBD IgG, anti-S1 IgG, anti-S2 IgG as well as anti-N IgG measurements.

#### 5. Specificity, sensitivity and cut-off determination

Methods: For establishing reliable cut-off values for RBD-, S1-, S2- and N-antibody measurements, sera of 84 PCR-confirmed COVID-19 patients (comprising mild and severe clinical presentation) were tested in the MIA-assay and the results were compared to a control panel of 128 pre-pandemic sera (**Fig.S6A**). Positive samples from PCR-confirmed severe-diseased COVID-19 patients (n=42) were left-over sera from AZ Delta Hospital (Belgium), collected  $\geq 15$  to 50 days post onset of symptoms. Positive samples from PCR-confirmed mild-diseased COVID-19 patients (n=42) originated from observational clinical trials in health care workers (Duysburgh E *et al*, Lancet Infect Dis 2021; 21(2):163-164 and Triest D *et al*, J Clin Virol 2021; 142:104897) and were collected 4-6 months post PCR-positivity. Negative control samples originated from the Belgian National Reference Center for *Bordetella pertussis* and were collected in 2018. Overlap between both groups for anti-S1 IgG and anti-N IgG can be explained by (i) cross-reactivity due to previous contact with endemic human coronaviruses in the control group, and (ii) low initial titers or waning of antibodies in the mild-diseased group. Assay performance at each individual cut-off was evaluated using ROC (Receiver Operating Characteristic) analyses (**Fig.S6B**) and a specificity-optimized cut-off was determined for each antigen (**Fig.S6C, Tab.S6**).

A

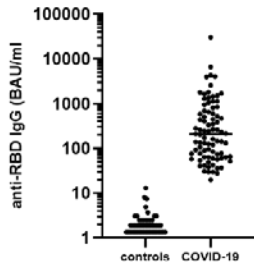

B

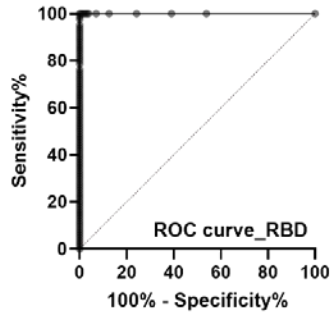

C

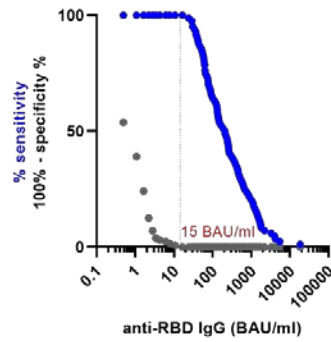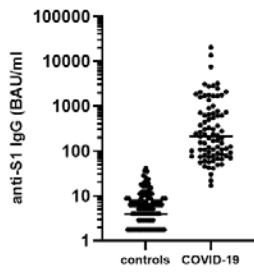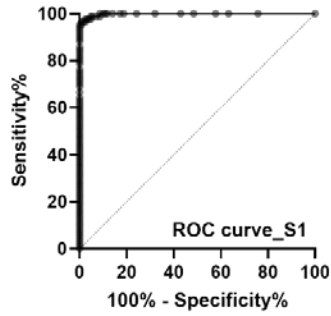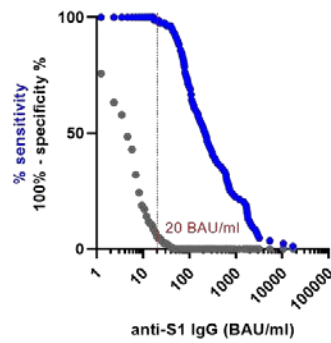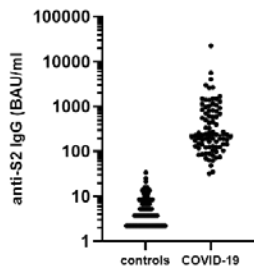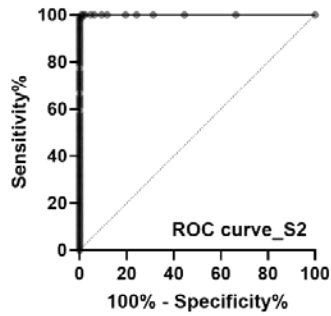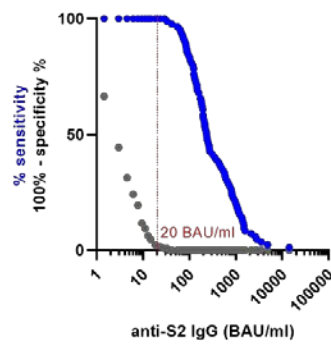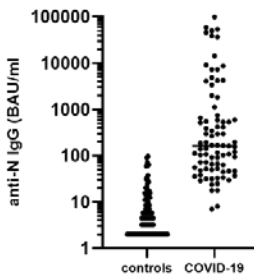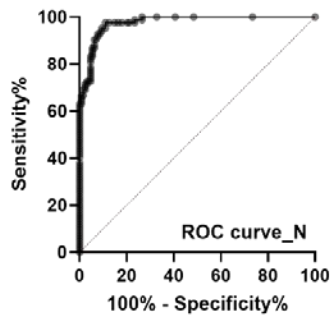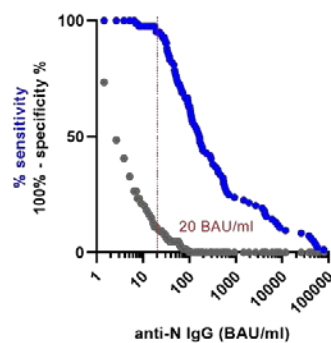

Supplementary Figure S6. Specificity, sensitivity and cut-off determination.

|              | cut-off<br>BAU/ml | specificity |             | sensitivity |             |
|--------------|-------------------|-------------|-------------|-------------|-------------|
|              |                   | %           | 95% CI      | %           | 95%CI       |
| anti-RBD IgG | >15               | 100         | 97.09-100   | 100         | 95.63-100   |
| anti-S1 IgG  | >20               | 95.31       | 90.15-97.83 | 98.81       | 93.56-99.94 |
| anti-S2 IgG  | >20               | 97.66       | 93.34-99.36 | 100         | 95.63-100   |
| anti-N IgG   | >20               | 89.06       | 82.48-93.37 | 95.24       | 88.39-98.13 |

**Supplementary Table S6.** Specificity-optimized cut-off.

**Conclusion:** The ROC-analyses generated cut-off concentrations of 15 BAU/ml, 20 BAU/ml, 20 BAU/ml and 20 BAU/ml for anti-RBD IgG, anti-S1 IgG, anti-S2 IgG and anti-N IgG, respectively. These cut-offs resulted in a specificity of 100%, 95,3%, 97,7% and 89,1% at a sensitivity of 100%, 98,8%, 100% and 95,2% for anti-RBD IgG, anti-S1 IgG, anti-S2 IgG and anti-N IgG, respectively.

#### 6. Conclusions of the MIA-assay qualification

The results obtained from the qualification process demonstrate that the MIA-assay is reliable, reproducible, and suitable for assessing anti-RBD IgG, anti-S1 IgG, anti-S2 IgG and anti-N IgG responses in human serum. The results indicate that the 4PL equation provides an accurate representation of a sigmoidal relationship between the measured response (MPI) and the logarithm of antibody concentrations.

## **B. Validation with commercially available assays**

**Methods:** To validate the anti-RBD IgG and anti-S1 IgG values obtained with the MIA-assay, a series of samples were quantified using commercial ELISA's, and the results compared. Samples obtained from the PICOV-VAC study (sampled day 21 post dose 1; n=165 for anti-RBD IgG; n= 105 for anti-S1 IgG) were quantified using (i) the WANTAI SARS-CoV-2 IgG ELISA (Quantitative)(Wantai Bio-Pharm, cat n° WS-1396; lot n°NCOGI20210301), detecting IgG antibodies directed to SARS-CoV-2 RBD, and (ii) the Anti-SARS-CoV-2 QuantiVac ELISA (IgG) (Euroimmun; cat n° EI 2606-9601-10 G; lot n° E210225AR), detecting IgG antibodies directed to SARS-CoV-2 S1. Diluted serum samples (1/10 to 1/6400) were tested against an internal standard, calibrated against NIBSC 20/136, control sera and blanks included on each plate. Net OD values were converted to arbitrary IgG units per ml by interpolation from a standard curve obtained by point-to-point plotting of the net OD readings measured from 6 calibration sera against the corresponding units (linear/linear) using GraphPad Prism (version 9.0.0 for Windows), exported to Microsoft Excel and adjusted for any sample dilution. Arbitrary IgG units were multiplied by factor 5.4 (RBD-ELISA) or factor 3.2 (S1-ELISA) to obtain Binding antibody units per ml (BAU/ml). The lower limits of quantification (LLOQ) were 5,4 BAU/ml and 3.2 BAU/ml for RBD- and S1-ELISA, respectively. The NIBSC 20/136 standard (1000 BAU/ml) returned values of 1042 BAU/ml (RBD-ELISA) and 1018 BAU/ml (S1-ELISA).

Correlation between the MIA-assay and the commercial ELISA's were examined (**Fig.S7**, upper panels). Comparisons between the MIA assay and the commercial ELISA's in naïve and in previously infected subjects were performed (**Fig.S7**, lower panels).

**Conclusions:** The MIA-assay shows a 1:1 correlation with the RBD-ELISA for anti-RBD IgG ( $R^2=0.9852$ ) and a 1:1 correlation with the S1-ELISA for anti-S1 IgG ( $R^2=0.9885$ ) (upper panels). Furthermore, Ab titers measured with the MIA-assay are comparable to those obtained with commercial assays in both study groups. The validation supports the reliability of the MIA-assay for the quantification of anti-RBD IgG and anti-S1 IgG in naïve and previously infected subjects.

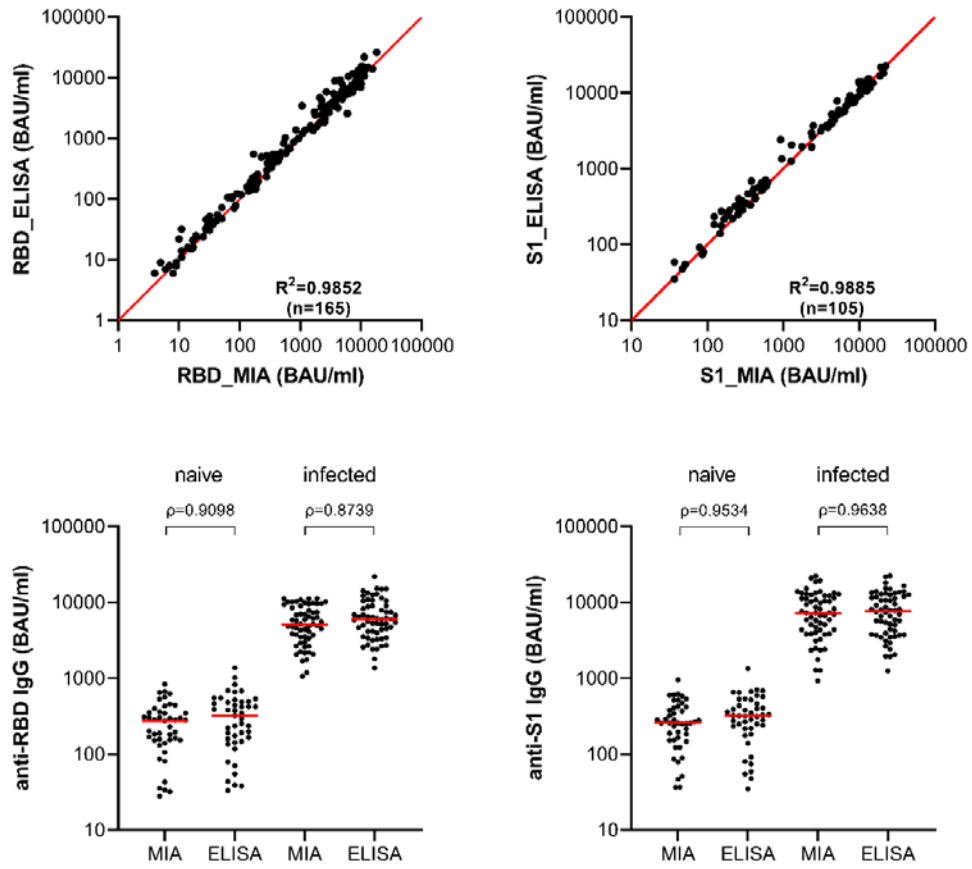

**Supplementary Figure S7.** Correlation between the MIA-assay and commercial ELISA's.
